# Supplementary material
Source: publisher figshare collection journal article supplement (https://acs.figshare.com/ndownloader/files/5810721)
Supplement: Supplementary file 1 [file 5810721]

## Convenient Synthesis of Cyclopropylalkanol Derivatives Possessing a Difluoromethylenephosphonate Group at the Ring

Tsutomu Yokomatsu, Hiroshi Abe, Takehiro Yamagishi, Kenji Suemune, and Shiroshi Shibuya\*

School of Pharmacy, Tokyo University of Pharmacy and Life Science

1432-1 Horinouchi, Hachioji, Tokyo 192-0392, Japan

FAX: +81-426-76-3239, E-mail: shibuyas@ps.toyaku.ac.jp

### Supporting Information

#### Procedure for Preparation of Ethyl (*E*)-3-Iodo-2-methylpropenoate (*E*)-13.

To a solution of (*E*)-3-iodo-2-methyl-2-propen-1-ol<sup>1</sup> (4.66 g, 23.53 mmol) in CH<sub>2</sub>Cl<sub>2</sub> (190 mL) at 0 °C were added Celite (10.5 g) and PCC (9.84 g, 45.7 mmol). The mixture was stirred at 0 °C for 4 h. The resulting suspension was filtered. The filtrate was washed with aqueous NaHCO<sub>3</sub> and brine, dried (MgSO<sub>4</sub>), and concentrated to afford crude (*E*)-3-iodo-2-methylpropanal. This compound was not characterized due to its rapid decomposition. To a mixture of crude (*E*)-3-iodo-2-methylpropanal in CH<sub>3</sub>CN (29 mL), NaH<sub>2</sub>PO<sub>4</sub>·H<sub>2</sub>O (974 mg) in H<sub>2</sub>O (19 mL), and H<sub>2</sub>O<sub>2</sub> (30%, 33 mL, 284.7 mmol) at 0 °C was added dropwise a solution of NaClO<sub>2</sub> (80%, 3.78 g, 33.4 mmol) in H<sub>2</sub>O (38 mL). The reaction mixture was stirred at the same temperature for 1 h and extracted with ether. The aqueous layer was acidified with 1N HCl and extracted with ether. The extracts were dried (MgSO<sub>4</sub>) and evaporated to give crude (*E*)-3-iodo-2-methylpropeonic acid. This compound was used for the next reaction without purification. A solution of crude (*E*)-3-iodo-2-methylpropeonic acid in EtOH (15 mL) containing 0.5 mL of c H<sub>2</sub>SO<sub>4</sub> was heated under reflux for 2 h. After removing EtOH *in vacuo*, the residue was basified with aqueous NaHCO<sub>3</sub>. The aqueous layer was extracted with CHCl<sub>3</sub>. The extracts were washed with brine, dried (MgSO<sub>4</sub>), and concentrated to give the residue. Purification by column chromatography on silica gel (*n*-hexane : EtOAc = 100 : 1) gave (*E*)-13

(2.31 g, 40.9% for 3 steps) as an oil.  $^1\text{H}$  NMR ( $\text{CDCl}_3$ , 400 MHz)  $\delta$  6.74 (1H, s), 3.68 (2H q,  $J = 7.1$  Hz), 1.53 (3H, s), 0.78 (3H, t,  $J = 7.1$  Hz);  $^{13}\text{C}$  NMR ( $\text{CDCl}_3$ , 100 MHz)  $\delta$  163.7, 139.7, 98.3, 61.2, 20.2, 14.1; IR (neat)  $1713\text{ cm}^{-1}$ ; EIMS  $m/z$  240 ( $\text{M}^+$ ). High resolution MS  $m/z$  calcd for 239.9647 ( $\text{M}^+$ ). Observed: 239.9660.

#### Reference

- (1) a) Liu, F.; Negishi, E. *J. Org. Chem.* **1997**, 62, 8591. b) Negishi, E.; Van Horn, D. E.; King, A. O.; Okukado, N. *Synthesis* **1979**, 501.
